# Supplementary figures and images for: Metabolic Communication by SGLT2 Inhibition
Source: PubMed Central journal article supplement — Circulation. 2023 Dec 28;149(11):860–84. doi: 10.1161/CIRCULATIONAHA.123.065517 (PMC10922673; doi:10.1161/circulationaha.123.065517), 2023-12-28

Full unedited gel for Figure 3E

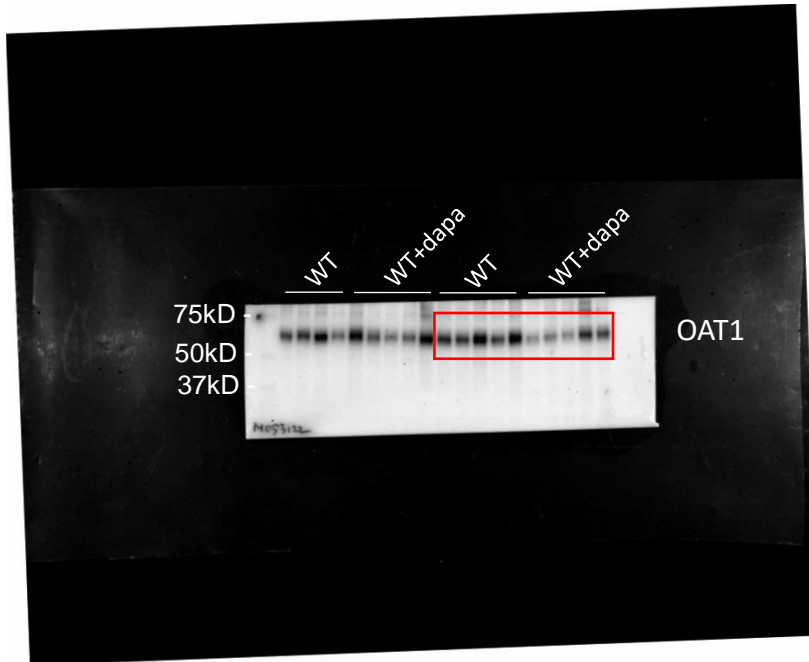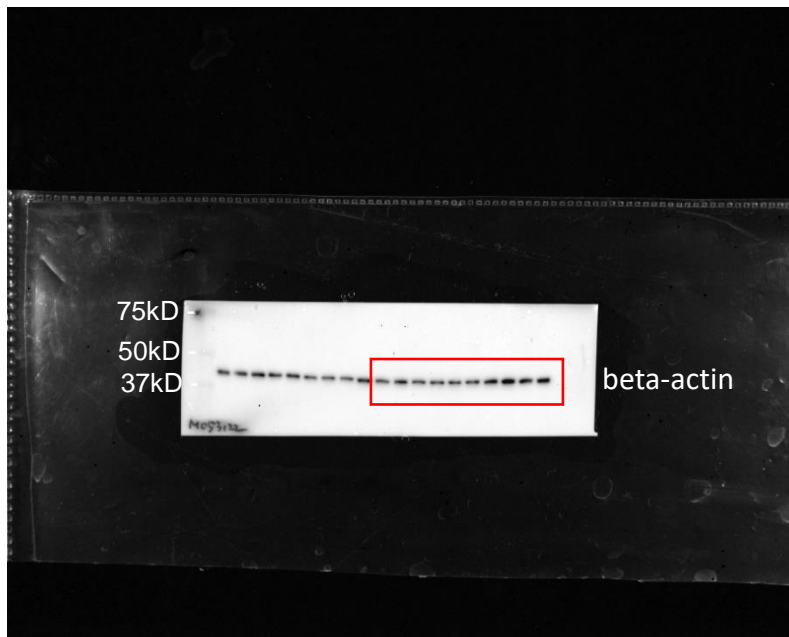

Supplement: cir-149-860-s013.pdf [file cir-149-860-s013.pdf]
